# Supplementary material for: CLA improves the lipo-nutritional quality of pork and regulates the gut microbiota in Heigai pigs
Source: Royal Society of Chemistry journal article supplement (doi:10.1039/d2fo02549c), 2022-01-01
Supplement: d2fo02549c1.pdf [file d2fo02549c1.pdf]

**Table S1.** Ingredient composition and nutritional levels of the diet.

| Ingredient                  | Content (%)  |              |
|-----------------------------|--------------|--------------|
|                             | Control      | CLA          |
| Corn                        | 68.6         | 68.6         |
| Soybean meal                | 19.0         | 19.0         |
| Wheat bran                  | 7.6          | 7.6          |
| Premix <sup>1</sup>         | 3.8          | 3.8          |
| Soybean oil                 | 1            | 0            |
| CLA                         | 0            | 1            |
| Total                       | 100          | 100          |
| Digestive energy, MJ/kg     | 14.2100      | 14.2105      |
| Metabolizable energy, MJ/kg | 13.3127      | 13.3130      |
| Lysine (%)                  | 0.72         | 0.72         |
| Methionine + Cystine (%)    | 0.53         | 0.53         |
| <b>Nutritional levels</b>   |              |              |
| Crude protein               | 13.613±0.615 | 13.780±1.290 |
| Crude fiber                 | 0.967±0.058  | 0.900±0.100  |
| Ether extract               | 5.380±0.320  | 5.547±0.804  |
| Water                       | 8.273±0.638  | 7.810±0.380  |

<sup>1</sup> Each kilogram of the premix contains 10.0-16.0 million IU vitamin A acetate, 5.0-212.0 million IU vitamin D3, 900mg DL- $\alpha$ -tocopherol acetate, 50.0 mg menadione, 40.0 mg ammonium sulphate nitrate, 160 mg riboflavin, 50.0 mg pyridoxine hydrochloride, 0.85 mg cyanocobalamin, 30.0 mg folic acid, 520mg nicotinamide, 280 mg D-calcium pantothenate, 2.0 mg D-biotin, 210-625 mg copper,  $1.50 \times 10^3$  -  $7.50 \times 10^3$  mg iron, 700 -  $2.1 \times 10^3$  mg manganese, 700 -  $2.0 \times 10^3$  mg zinc, 15.0 mg iodine, 3.0-9.0 mg selenium, etc. The rest is limestone powder.

**Table S2.** Effects of CLA on the growth performance of Heigai pigs<sup>1</sup>.

| Growth Performance <sup>2</sup> | Control      | CLA          | SEM <sup>3</sup> | P-value |
|---------------------------------|--------------|--------------|------------------|---------|
| Initial weight                  | 87.28±10.97  | 83.88±9.68   | 2.765            | 0.224   |
| Final weight                    | 105.21±11.44 | 102.29±10.44 | 2.926            | 0.321   |

|                       |            |            |       |       |
|-----------------------|------------|------------|-------|-------|
| Total weight gain(kg) | 17.93±5.67 | 18.40±5.60 | 1.506 | 0.755 |
| ADG (kg/d)            | 0.51±0.16  | 0.53±0.16  | 0.043 | 0.755 |
| ADFI (kg/d)           | 2.56±0.29  | 2.46±0.36  | 0.266 | 0.709 |
| F:G ratio             | 5.47±1.61  | 5.09±1.60  | 0.429 | 0.377 |

<sup>1</sup> Results were presented by mean ± SD; n = 28, number of replicates.

<sup>2</sup> ADG, average daily gain; ADFI, average daily feed intake; F:G ratio, ratio of feed to gain.

<sup>3</sup> SEM, standard error of the mean.

**Table S3.** Effects of CLA on the carcass traits of Heigai pigs<sup>1</sup>.

<sup>1</sup> Results were presented by mean ± SD; n = 8, number of replicates; \*  $P < 0.05$ .

<sup>2</sup> SEM, standard error of the mean.

| <b>Carcass Quality Traits</b>       | <b>Control</b> | <b>CLA</b>  | <b>SEM<sup>2</sup></b> | <b><i>P</i>-value</b> |
|-------------------------------------|----------------|-------------|------------------------|-----------------------|
| Slaughter weight (kg)               | 98.94±3.34     | 98.00±3.39  | 1.684                  | 0.586                 |
| Carcass weight (kg)                 | 77.18±2.17     | 74.73±3.90  | 1.578                  | 0.143                 |
| Dressing percentage (%)             | 78.10±3.86     | 76.29±4.05  | 1.978                  | 0.376                 |
| Straight length (cm)                | 99.13±4.22     | 99.56±2.77  | 1.783                  | 0.810                 |
| Dip length (cm)                     | 83.88±4.13     | 84.63±2.15  | 1.646                  | 0.656                 |
| Carcass length (cm)                 | 91.51±4.04     | 92.13±2.22  | 1.630                  | 0.713                 |
| Skin thickness (mm)                 | 4.24±0.45      | 4.25±0.63   | 0.274                  | 0.964                 |
| Backfat thickness (mm)              | 41.75±6.33     | 35.64±4.23* | 2.692                  | 0.039                 |
| Loin muscle area (cm <sup>2</sup> ) | 26.73±4.38     | 26.88±6.31  | 2.717                  | 0.955                 |
| Lean percentage (%)                 | 57.65±1.36     | 59.04±1.47  | 0.708                  | 0.071                 |

**Table S4.** The primer sequence of qPCR.

| Primer name      | Sequence (5'-3')       |
|------------------|------------------------|
| 18s-F            | CCCACGGAATCGAGAAAGAG   |
| 18s-R            | TTGACGGAAGGGCACCA      |
| Acc-F            | AGCAAGGTCGAGACCGAAAG   |
| Acc-R            | TAAGACCACCGGCGGATAGA   |
| Atgl-F           | GCACCTTCATTCCCGTGTAC   |
| Atgl-R           | TTGTCTGAGATGCCACCGTC   |
| Fabp4-F          | TGGAAACTTGTCTCCAGTG    |
| Fabp4-R          | GGTACTTTCTGATCTAATGGTG |
| Hsl-F            | CCCCGTGCGCTGGAGGAGT    |
| Hsl-R            | GGGAGGGGGAGGCGGCAGAC   |
| Ppar $\gamma$ -F | GGCGAGGGCGATCTTGACAG   |
| Ppar $\gamma$ -R | GATGCGAATGGCCACCTCTTT  |
| Scd1-F           | CAAACACCCAGCCGTCAAAG   |
| Scd1-R           | CGAAGAAAGGTGGCGACGAA   |

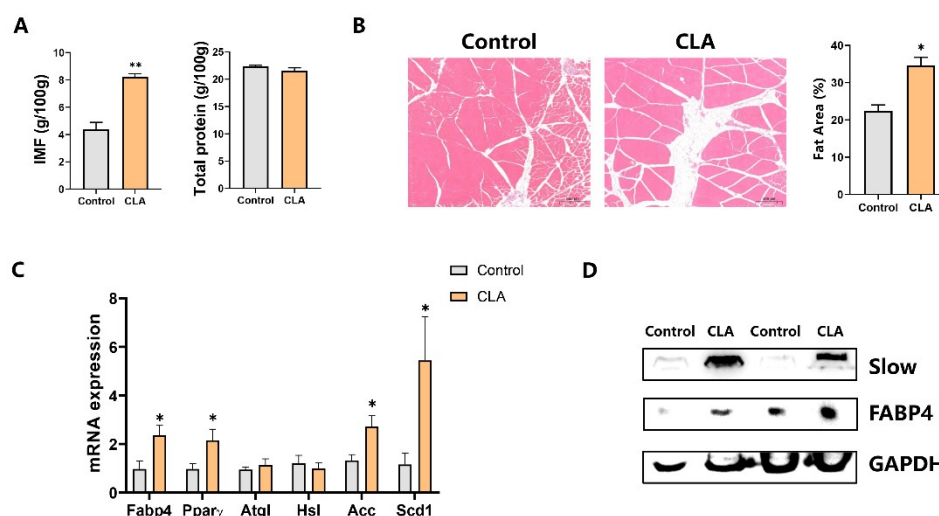

**Supplementary Figure 1. CLA increases fat deposition and regulates lipid metabolism in LDM of Heigai pigs.** (A) The contents of IMF and total protein in LDM from Heigai pigs fed with different diets (soybeal oil, “Control”; CLA, “CLA”; n = 3). (B) H&E staining and fat area statistics of LDM sections from Control and CLA pigs. Scale bars, 500  $\mu$ m (n=3). (C) The expression of lipid metabolism relative genes in LDM from Control and CLA pigs (n=5). (D) Protein levels of FABP4 and Slow muscle heavy chain were detected by western blot. Error bars represent SEM. \* $P < 0.05$ , \*\* $P < 0.01$

< 0.01, two-tailed Student's t-test.

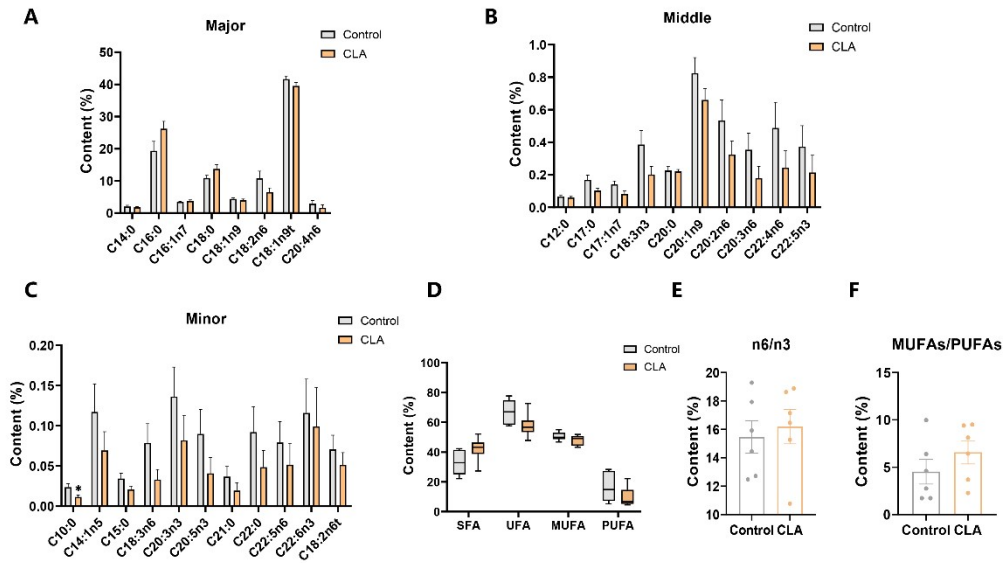

**Supplementary Figure 2. The changes of fatty acid composition in LDM of Heigai pigs after feeding CLA. (A–C)** The concentration of individual fatty acids in LDM from Control and CLA pigs. Fatty acids are divided into major (A), middle (B) and minor (C) species based on abundance. **(D)** The contents of total SFAs, UFAs, MUFAs and PUFAs in LDM from Control and CLA pigs. SFAs, saturated fatty acids; UFAs, unsaturated fatty acids; MUFAs, monounsaturated fatty acids; PUFAs, polyunsaturated fatty acids. **(E–G)** The ratio of n6-fatty acids/n3-fatty acids (n6/n3) (E) and MUFAs/PUFAs (G) in LDM from Control and CLA pigs. n = 6. Error bars represent SEM. \* $P < 0.05$ , \*\* $P < 0.01$ , two-tailed Student's t-test.

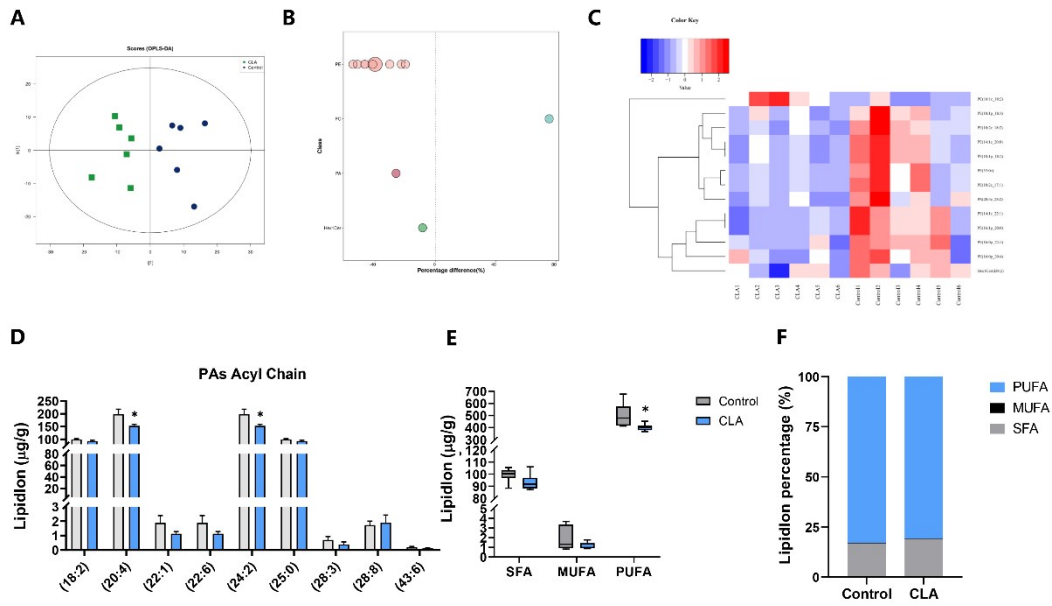

**Supplementary Figure 3.** (A) OPLS-DA plot of differentially lipids in different group. (B) Bubble plot of differentially lipids between Control and CLA group. (C) Heatmap of differentially lipid species in different group. (D) The changes of individual fatty-acyl chains associated with PAs. (E) PAs acyl chain content at different saturation levels. (F) PAs acyl chain percentage at different saturation levels.  $n = 6$ . Error bars represent SEM.  $*P < 0.05$ , two-tailed Student's  $t$ -test.

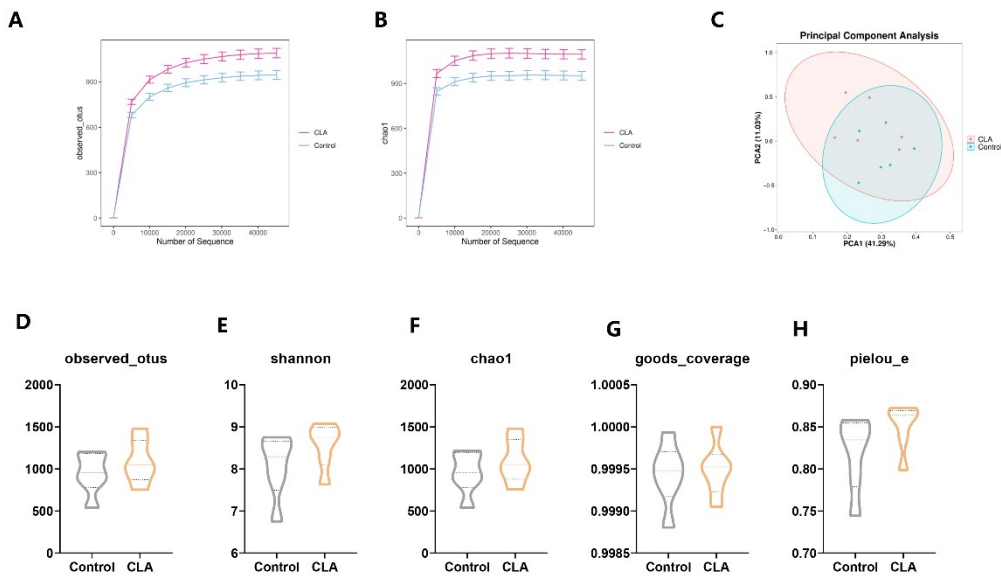

**Supplementary Figure 4.** (A-B) Differences in the colonic bacterial  $\alpha$ -diversity index after CLA treatment. Data are presented as mean  $\pm$  SEM ( $n = 6$ ). (C) PCA plot of differentially bacterial taxa in different group. (D-H) Rarefaction curve comparing the

number of OTUs found in the 16S rDNA gene libraries from microbiota in the colon.
